# Supplementary material for: Novel heterogeneous Fenton catalysts prepared using electrolytic manganese residue for efficient degradation of acetaminophen
Source: Royal Society of Chemistry journal article supplement (doi:10.1039/d5ra01539a), 2025-01-01
Supplement: d5ra01539a1.pdf [file d5ra01539a1.pdf]

## **Supplementary Information**

### **Novel heterogeneous Fenton catalysts prepared from electrolytic manganese residue for efficient degradation of acetaminophen**

Hangdao Qin,<sup>\*a</sup> Junnan Hao,<sup>a</sup> Yong Wang<sup>a</sup>, Jiming Huang,<sup>a</sup> Jun Chang,<sup>a</sup> Guo Yang,<sup>b</sup>

Bo Xing,<sup>b</sup> Sizhan Wu,<sup>a</sup> and Jing Chen<sup>a</sup>

<sup>a</sup> School of Material and Chemical Engineering, Tongren University, Tongren 554300, China

<sup>b</sup> College of Chemical Engineering, Sichuan University of Science and Engineering, Zigong

643000, China

\* Corresponding author: Hangdao Qin

E-mail address: qinhangdao@126.com

Text S1: Acetaminophen was obtained from Shanghai Yien Chemical Technology Co. Ltd., China.  $\text{Mn}(\text{NO}_3)_2 \cdot 9\text{H}_2\text{O}$ ,  $\text{Fe}(\text{NO}_3)_3 \cdot 9\text{H}_2\text{O}$ ,  $\text{Ce}(\text{NO}_3)_3 \cdot 6\text{H}_2\text{O}$ ,  $\text{Zn}(\text{NO}_3)_2 \cdot 9\text{H}_2\text{O}$  and  $\text{CoCl}_2 \cdot 6\text{H}_2\text{O}$ , NaOH,  $\text{HNO}_3$ , methanol (EtOH), *tert*-butanol (TBA), benzoquinone (BQ),  $\text{NaHCO}_3$ , NaCl,  $\text{NaNO}_3$ ,  $\text{NaH}_2\text{PO}_4$ , humic acid (HA) and 5,5-dimethyl-1-pyrroline-N-oxide (DMPO) were purchased from Sinopharm Chemical Reagent Co. Ltd., China.

Text S2: The crystallographic structure of the catalysts was characterized by X-ray diffraction (XRD) in the  $2\theta$  range of  $10^{\circ}$ - $80^{\circ}$  on a Rigaku Ultima IV diffractometer. The specific surface area, pore volume and average pore width of the catalysts were analyzed by  $N_2$  adsorption-desorption automatic specific surface area analyzer (ASAP 2460, Micromeritics, USA). A field emission scanning electron microscope (FE-SEM, ZEISS Sigma 300, Germany) was used to observe the surface morphology of catalysts. SEM images were obtained by a scanning electron microscope (FE-SEM, ZEISS Sigma 300, Germany) armed with an EDS system. TEM was carried out using a FEI Tecnai F20 (USA) transmission electron microscope. Analysis of surface chemical information for the catalysts was performed by X-ray photoelectron spectrometry (XPS, Thermo Scientific ESCALAB 250Xi, USA). The formation of the radicals in the reaction was determined by electron paramagnetic resonance spectroscopy (EPR, Bruker EMXPlus, Germany) using 5,5-dimethyl-1-pyrroline N-oxide (DMPO) as the trapping reagent.

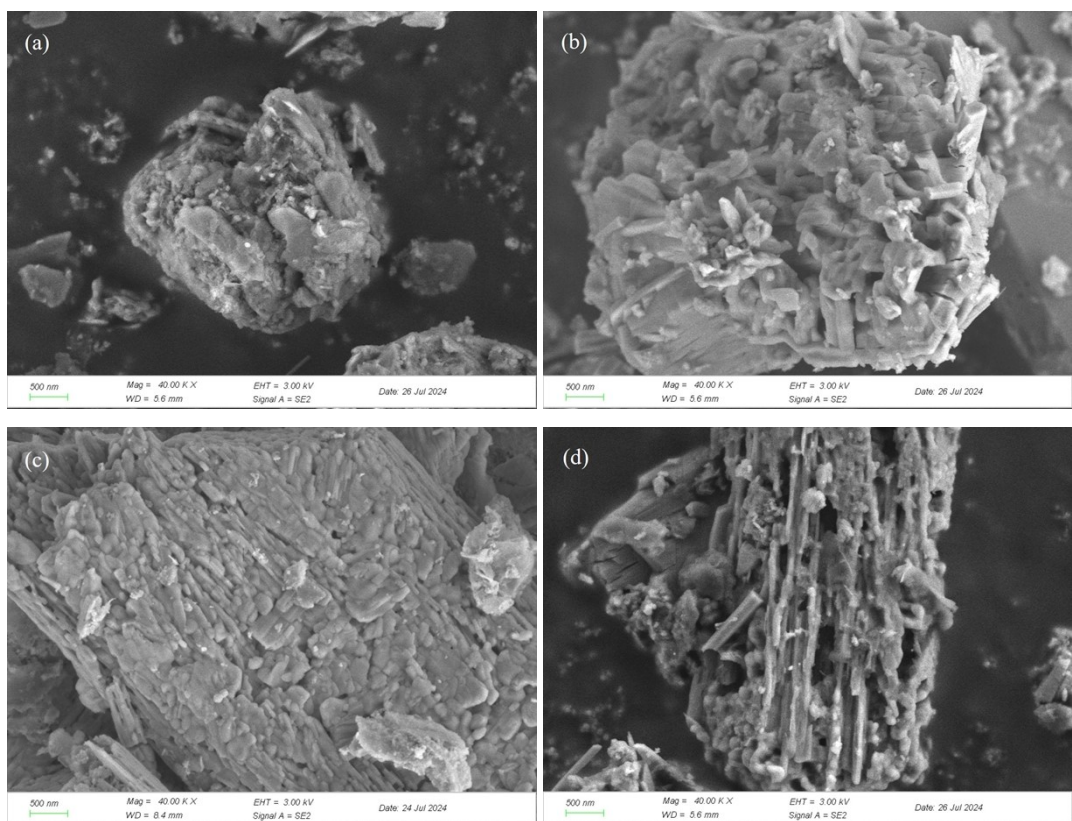

**Fig. S1** SEM images of Mn/EMR (a), Fe/EMR (b), Ce/EMR (c) and Zn/EMR (d).

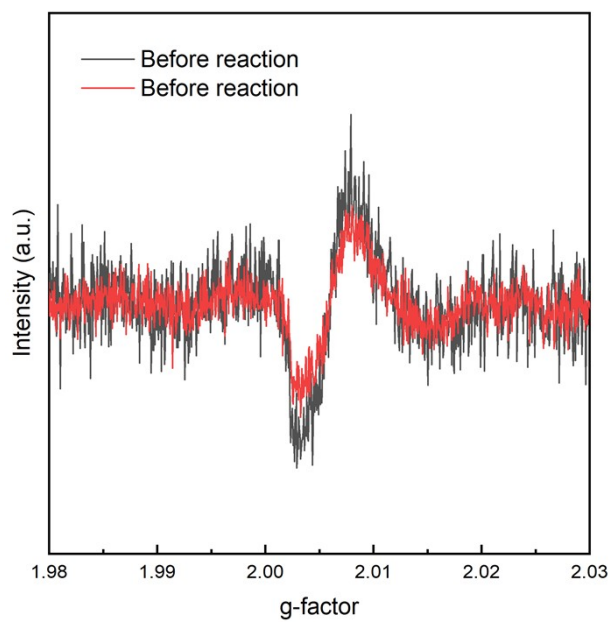

**Fig. S2** Solid EPR spectra of Co/EMR before and after reaction.
